# Supplementary material for: Microstructure modulation improving the stability performance of a Bi anode for lithium-ion batteries
Source: Royal Society of Chemistry journal article supplement (doi:10.1039/d4nr05212a), 2025-01-01
Supplement: d4nr05212a1.pdf [file d4nr05212a1.pdf]

Supplementary Material

**Microstructure modulation improving stability performance of Bi  
anode for lithium-ion batteries**

Yiwen Chen,<sup>1</sup> Cheng-Lu Yang,<sup>1</sup> Jun Guo,<sup>\*1,2</sup> Bu-Ming Chen,<sup>\*1,2,3</sup> Hui Huang,<sup>1,2,3</sup> Ruidong Xu<sup>1,2</sup>

1. Faculty of Metallurgical and Energy Engineering, Kunming University of Science and  
Technology, Kunming 650093, China

2. Research Center of Yunnan Metallurgical Electrode Materials Engineering Technology,  
Kunming 650106, China

3. Kunming Hendera Science and Technology Co., Ltd, Kunming 650106, China

\*Corresponding author: [J.Guo \(1038gj@kust.edu.cn\)](mailto:J.Guo@kust.edu.cn); [B.-M. Chen \(bumchen@kust.edu.cn\)](mailto:B.-M.Chen@kust.edu.cn);

Figures

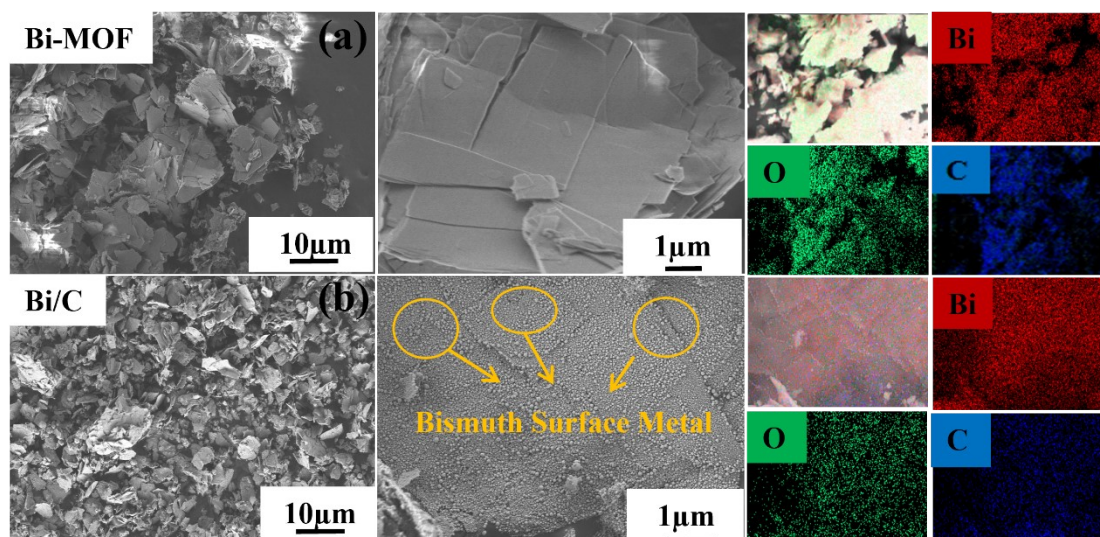

Fig. S1 (a) SEM and EDS plots of Bi-MOF; (b) SEM and EDS plots of Bi/C

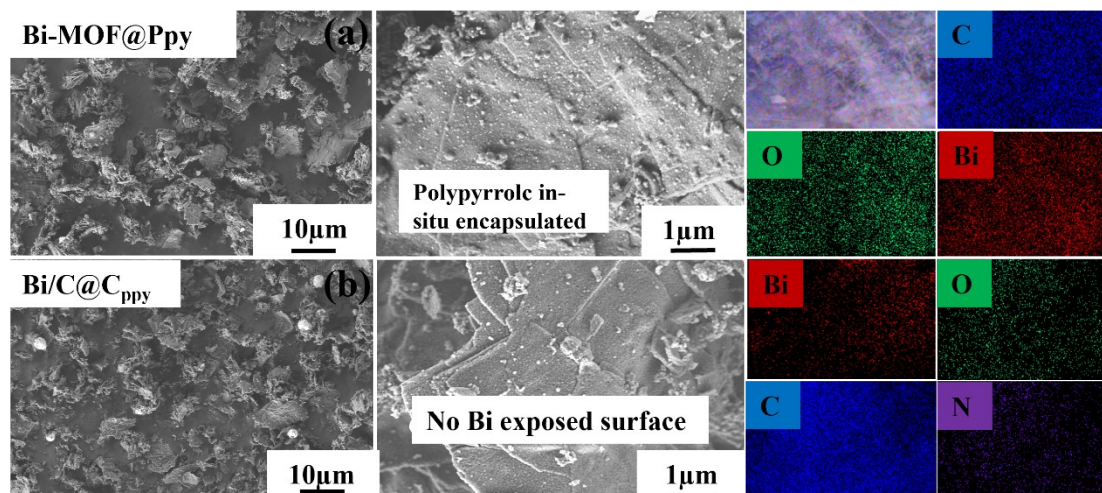

Fig. S2 (a) SEM and EDS plots of Bi-MOF@Ppy; (b) SEM and EDS plots of Bi/C@Cppy

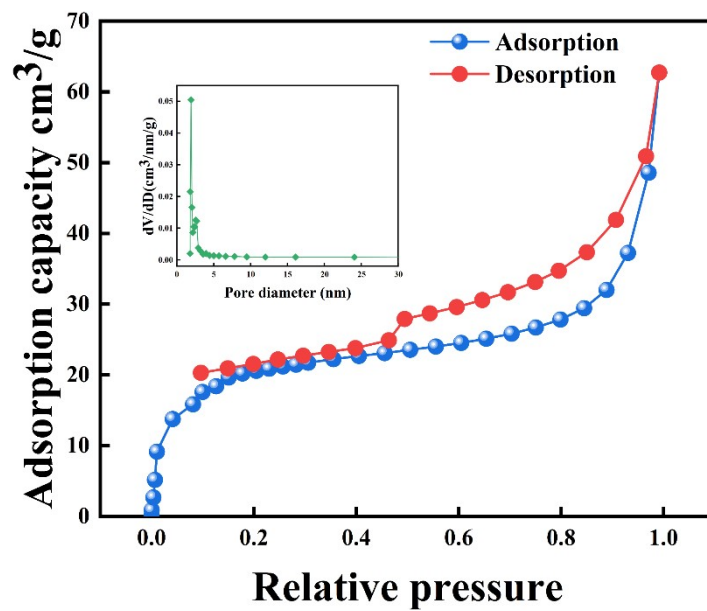

Fig.S3 N<sub>2</sub> adsorption-desorption isotherm

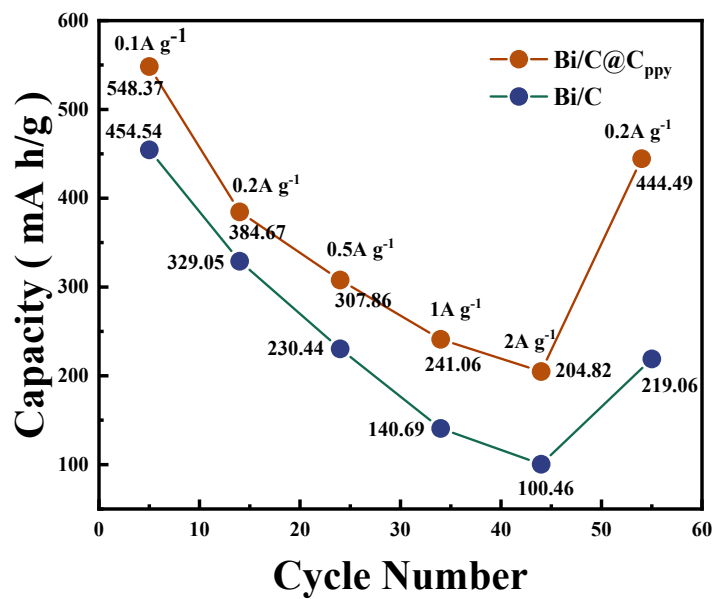

Fig.S4 The initial discharge/charge profiles of electrodes at various current densities

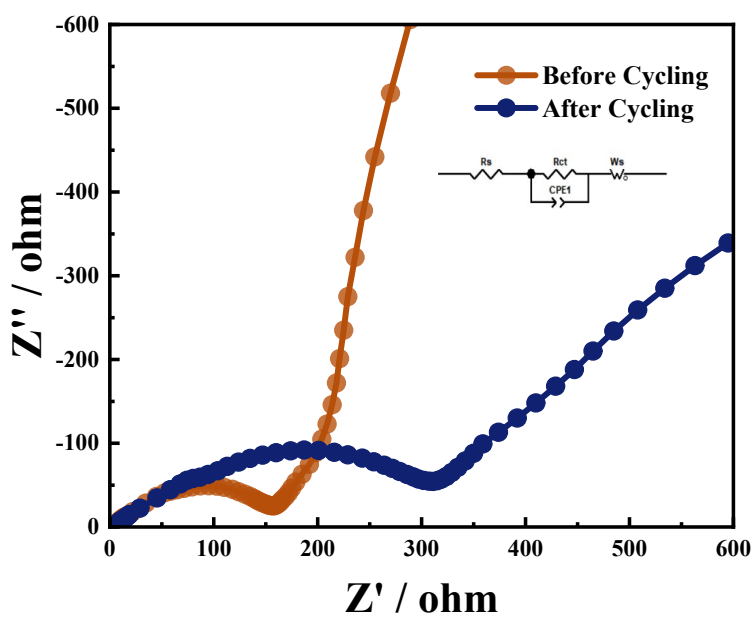

Fig. S5 The EIS curves of the Bi/C@C<sub>ppy</sub> after cycling

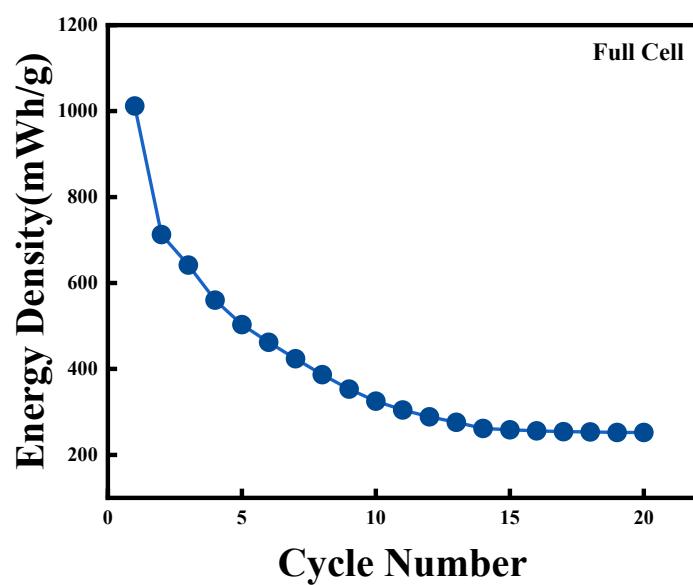

Fig. S6 The energy density of the full battery

Table S1 A comparison of this work and the reported Bi/C anodes

| sample name                          | strategy                           | discharge capacity                           | full cell |
|--------------------------------------|------------------------------------|----------------------------------------------|-----------|
| Bi <sub>2</sub> S <sub>3</sub> @C[1] | carbon coated                      | 331mAhg <sup>-1</sup> @10Ag <sup>-1</sup>    |           |
| Bi@C/C NL[2]                         | sandwiched<br>carbon<br>nanolayers | 427.5mAhg <sup>-1</sup> @0.5Ag <sup>-1</sup> |           |
| Bi <sub>2</sub> /C[3]                | Yolk-Shell<br>Bi@C<br>Nanospheres  | 200mAhg <sup>-1</sup> @1.25Ag <sup>-1</sup>  |           |

---

|                                           |                                     |        |                                                                                  |                                                                                                                      |
|-------------------------------------------|-------------------------------------|--------|----------------------------------------------------------------------------------|----------------------------------------------------------------------------------------------------------------------|
| Bi@C[4]                                   | micro/meso-<br>porous<br>nanoplates | Bi@C   | 556 mA hg <sup>-1</sup> mAhg <sup>-1</sup><br><sup>1</sup> @0.01Ag <sup>-1</sup> |                                                                                                                      |
| This work<br><br>(Bi/C@C <sub>Ppy</sub> ) | in-situ<br><br>coated               | carbon | 526.4mAhg <sup>-1</sup> @0.1Ag <sup>-1</sup>                                     | Li <sub>1.2</sub> N <sub>0.13</sub> Co <sub>0.13</sub> M<br><br>n <sub>0.64</sub> O <sub>2</sub> //Bi/C@C<br><br>Ppy |

---

## References

- [1] C. Tang, K. Xiao, J. Liu, T. Cui, X. An, F. Shan, J. Ning, J. Yang, Z. Min, Carbon coated Bi<sub>2</sub>S<sub>3</sub> microwires as anode for enhanced lithium storage, *Solid State Ionics*, 403 (2023)
- [2] X. Liu, J. Xie, Y. Tang, J. Guo, Z. Lu, B. Liu, H. Zhang, Y. Cao, Bi@C sandwiched carbon nanolayers enables remarkable cyclability at high current density for lithium-ion batteries, *Applied Surface Science*, 613 (2023) 155996.
- [3] X. Xu, D. Zhang, Z. Wang, S. Zuo, J. Shen, Z. Liu, J. Liu, Facile Synthesis of Yolk–Shell Bi@C Nanospheres with Superior Li-ion Storage Performances, *Acta Metallurgica Sinica*, 34 (2020) 347-353.
- [4] M.-K. Kim, M.-S. Kim, J.-H. Park, J. Kim, C.-Y. Ahn, A. Jin, J. Mun, Y.-E. Sung, Bi-MOF derived micro/meso-porous Bi@C nanoplates for high performance lithium-ion batteries, *Nanoscale*, 12 (2020) 15214-15221.
